# Supplementary material for: Association of Dietary Intake and Biomarker Levels of Arsenic, Cadmium, Lead, and Mercury among Asian Populations in the United States: NHANES 2011–2012
Source: PubMed Central journal article supplement (PMC5332183; doi:10.1289/ehp28), 2016-09-02
Supplement: EHP28.s001.acco.pdf [file EHP28.s001.acco.pdf]

**Note to readers with disabilities:** *EHP* strives to ensure that all journal content is accessible to all readers. However, some figures and Supplemental Material published in *EHP* articles may not conform to [508 standards](#) due to the complexity of the information being presented. If you need assistance accessing journal content, please contact [ehp508@niehs.nih.gov](mailto:ehp508@niehs.nih.gov). Our staff will work with you to assess and meet your accessibility needs within 3 working days.

## **Supplemental Material**

# **Association of Dietary Intake and Biomarker Levels of Arsenic, Cadmium, Lead, and Mercury among Asian Populations in the U.S.: NHANES 2011–2012**

Hiroshi Awata, Stephen Linder, Laura E. Mitchell, and George L. Delclos

### **Table of Contents**

**Table S1.** Per Capita Intake of Food (g-food/kg-BW/day) Across Race and Ethnic Groups

**Table S2.** Per Capita Intake of Food (g-food/kg-BW/day) Across Asian Subgroups

**Figure S1.** Food-category-specific %contribution to dietary cadmium intake by race/ethnicity

**Figure S2.** Food-category-specific %contribution to dietary lead intake by race/ethnicity

**Figure S3.** Food-category-specific %contribution to dietary mercury intake by race/ethnicity

Table S1 - Per Capita Intake of Food (g-food/kg-BW/day) Across Race and Ethnic Groups

| Food Category   | Non-Hispanic White<br>N=2153 |      |       |                  | Non-Hispanic Black<br>N=1738 |                  |      |       | Mexican American<br>N=788 |                  |                  |      | Other Hispanic<br>N=636 |                  |                  |                  | Non-Hispanic Asian<br>N=785 |       |                  |                  |         |      |       |      |       |
|-----------------|------------------------------|------|-------|------------------|------------------------------|------------------|------|-------|---------------------------|------------------|------------------|------|-------------------------|------------------|------------------|------------------|-----------------------------|-------|------------------|------------------|---------|------|-------|------|-------|
|                 | (%) <sup>a</sup>             | Mean | SE    | Percentile       |                              | (%) <sup>a</sup> | Mean | SE    | Percentile                |                  | (%) <sup>a</sup> | Mean | SE                      | Percentile       |                  | (%) <sup>a</sup> | Mean                        | SE    | Percentile       |                  |         |      |       |      |       |
|                 |                              |      |       | 50 <sup>th</sup> | 95 <sup>th</sup>             |                  |      |       | 50 <sup>th</sup>          | 95 <sup>th</sup> |                  |      |                         | 50 <sup>th</sup> | 95 <sup>th</sup> |                  |                             |       | 50 <sup>th</sup> | 95 <sup>th</sup> |         |      |       |      |       |
| Vegetables      | (100.0)                      | 3.69 | 0.123 | 3.06             | 8.30                         | (100.0)          | 3.07 | 0.080 | 2.41                      | 7.66             | (100.0)          | 3.55 | 0.080                   | 3.05             | 7.52             | (100.0)          | 3.41                        | 0.168 | 2.75             | 8.13             | (100.0) | 4.63 | 0.115 | 4.14 | 10.16 |
| Fruits          | (98.6)                       | 3.00 | 0.124 | 2.04             | 9.05                         | (98.7)           | 2.85 | 0.108 | 1.81                      | 9.58             | (98.3)           | 3.51 | 0.172                   | 2.28             | 12.08            | (98.4)           | 3.70                        | 0.238 | 2.53             | 11.18            | (99.4)  | 3.90 | 0.229 | 2.80 | 11.39 |
| Mushroom        | (19.9)                       | 0.05 | 0.005 | --               | 0.31                         | (11.6)           | 0.03 | 0.004 | --                        | 0.18             | (14.6)           | 0.03 | 0.006                   | --               | 0.18             | (13.1)           | 0.04                        | 0.007 | --               | 0.24             | (32.0)  | 0.11 | 0.016 | --   | 0.57  |
| Nuts            | (59.4)                       | 0.12 | 0.014 | <0.01            | 0.61                         | (52.2)           | 0.07 | 0.011 | <0.01                     | 0.31             | (54.3)           | 0.07 | 0.008                   | <0.01            | 0.33             | (47.5)           | 0.16                        | 0.073 | --               | 0.34             | (64.7)  | 0.24 | 0.040 | 0.02 | 0.87  |
| Herbs/Spices    | (98.5)                       | 0.01 | 0.001 | 0.01             | 0.03                         | (96.7)           | 0.01 | 0.001 | 0.01                      | 0.04             | (95.5)           | 0.02 | 0.001                   | 0.01             | 0.04             | (93.8)           | 0.02                        | 0.002 | 0.01             | 0.05             | (94.5)  | 0.01 | 0.001 | 0.01 | 0.04  |
| Cereal Grains   | (100.0)                      | 2.98 | 0.055 | 2.53             | 6.55                         | (100.0)          | 2.97 | 0.090 | 2.37                      | 7.15             | (100.0)          | 3.60 | 0.126                   | 3.26             | 7.55             | (99.2)           | 3.11                        | 0.151 | 2.64             | 7.07             | (100.0) | 3.40 | 0.080 | 3.07 | 6.77  |
| Rice, white     | (42.8)                       | 0.23 | 0.016 | --               | 1.01                         | (44.5)           | 0.29 | 0.029 | --                        | 1.29             | (52.9)           | 0.32 | 0.022                   | 0.02             | 1.36             | (70.8)           | 0.53                        | 0.048 | 0.42             | 1.71             | (84.3)  | 1.09 | 0.034 | 0.97 | 2.73  |
| Rice, brown     | (12.2)                       | 0.04 | 0.006 | --               | 0.22                         | (8.4)            | 0.05 | 0.010 | --                        | 0.28             | (8.7)            | 0.03 | 0.007                   | --               | 0.08             | (9.6)            | 0.05                        | 0.012 | --               | 0.47             | (20.4)  | 0.14 | 0.022 | --   | 0.90  |
| Beef            | (86.4)                       | 0.85 | 0.044 | 0.63             | 2.62                         | (86.9)           | 0.80 | 0.071 | 0.51                      | 2.56             | (86.5)           | 1.10 | 0.093                   | 0.78             | 3.40             | (79.0)           | 0.84                        | 0.062 | 0.55             | 2.60             | (76.8)  | 0.79 | 0.053 | 0.34 | 3.00  |
| Pork            | (79.6)                       | 0.43 | 0.023 | 0.21             | 1.54                         | (80.7)           | 0.45 | 0.040 | 0.24                      | 1.67             | (85.5)           | 0.44 | 0.021                   | 0.28             | 1.29             | (78.1)           | 0.43                        | 0.033 | 0.23             | 1.56             | (71.3)  | 0.56 | 0.055 | 0.15 | 2.08  |
| Poultry         | (72.4)                       | 0.93 | 0.031 | 0.75             | 3.00                         | (84.3)           | 1.25 | 0.031 | 1.03                      | 3.55             | (76.4)           | 1.09 | 0.049                   | 0.80             | 3.19             | (76.2)           | 1.26                        | 0.092 | 1.00             | 3.72             | (82.2)  | 1.23 | 0.074 | 0.98 | 3.87  |
| Other Meat      | (13.9)                       | 0.02 | 0.004 | --               | 0.01                         | (21.3)           | 0.02 | 0.010 | --                        | 0.02             | (12.2)           | 0.02 | 0.014                   | --               | 0.01             | (12.8)           | 0.03                        | 0.018 | --               | 0.01             | (16.8)  | 0.04 | 0.008 | --   | 0.02  |
| Fish            | (28.9)                       | 0.36 | 0.046 | --               | 1.94                         | (32.9)           | 0.47 | 0.063 | --                        | 2.54             | (26.9)           | 0.43 | 0.052                   | --               | 2.80             | (28.3)           | 0.43                        | 0.075 | --               | 2.61             | (52.9)  | 0.84 | 0.058 | 0.01 | 3.52  |
| Fish-freshwater | (6.2)                        | 0.07 | 0.015 | --               | 0.03                         | (7.4)            | 0.11 | 0.023 | --                        | 0.60             | (2.9)            | 0.05 | 0.019                   | --               | --               | (8.1)            | 0.08                        | 0.030 | --               | 0.05             | (16.5)  | 0.15 | 0.027 | --   | 1.37  |
| Fish-saltwater  | (18.1)                       | 0.20 | 0.032 | --               | 1.37                         | (20.0)           | 0.29 | 0.039 | --                        | 1.80             | (16.8)           | 0.27 | 0.049                   | --               | 1.81             | (16.7)           | 0.23                        | 0.055 | --               | 1.53             | (40.5)  | 0.58 | 0.062 | --   | 3.09  |
| Fish-shellfish  | (11.4)                       | 0.12 | 0.016 | --               | 0.79                         | (13.8)           | 0.11 | 0.021 | --                        | 0.77             | (13.2)           | 0.13 | 0.033                   | --               | 0.71             | (12.6)           | 0.14                        | 0.040 | --               | 0.92             | (27.3)  | 0.25 | 0.038 | --   | 1.46  |
| Dairy           | (99.9)                       | 4.17 | 0.134 | 2.63             | 13.66                        | (99.8)           | 2.69 | 0.216 | 1.36                      | 9.98             | (100.0)          | 4.70 | 0.203                   | 3.07             | 14.60            | (99.9)           | 4.04                        | 0.192 | 2.46             | 12.11            | (99.2)  | 3.85 | 0.207 | 2.09 | 13.72 |
| Egg             | (95.3)                       | 0.38 | 0.017 | 0.17             | 1.40                         | (96.8)           | 0.38 | 0.019 | 0.19                      | 1.43             | (94.8)           | 0.57 | 0.033                   | 0.30             | 1.87             | (93.3)           | 0.50                        | 0.039 | 0.19             | 1.83             | (90.8)  | 0.47 | 0.017 | 0.26 | 1.67  |
| Oil             | (99.9)                       | 0.06 | 0.002 | 0.04             | 0.18                         | (100.0)          | 0.06 | 0.003 | 0.04                      | 0.19             | (100.0)          | 0.07 | 0.006                   | 0.04             | 0.23             | (99.2)           | 0.04                        | 0.003 | 0.03             | 0.12             | (99.9)  | 0.05 | 0.003 | 0.03 | 0.14  |

Units are presented in g-food/kg-body weight/day. <sup>a</sup> Individuals who consumed any food commodities within food category were identified as Consumer. -- Not calculated due to high frequency of non-detected results (below limit of detection). SE - Standard Error, BW- Body Weight.

Table S2 - Per Capita Intake of Food (g-food/kg-BW/day) Across Asian Subgroups

| Food Category   | Chinese          |      |       |                  |                  | Asian Indian     |      |       |                  |                  | Other Asian      |      |       |                  |                  |
|-----------------|------------------|------|-------|------------------|------------------|------------------|------|-------|------------------|------------------|------------------|------|-------|------------------|------------------|
|                 | (%) <sup>a</sup> | Mean | SE    | Percentile       |                  | (%) <sup>a</sup> | Mean | SE    | Percentile       |                  | (%) <sup>a</sup> | Mean | SE    | Percentile       |                  |
|                 |                  |      |       | 50 <sup>th</sup> | 95 <sup>th</sup> |                  |      |       | 50 <sup>th</sup> | 95 <sup>th</sup> |                  |      |       | 50 <sup>th</sup> | 95 <sup>th</sup> |
| Vegetables      | (100.0)          | 5.62 | 0.316 | 5.22             | 10.45            | (100.0)          | 4.63 | 0.344 | 4.19             | 8.37             | (100.0)          | 4.35 | 0.152 | 3.65             | 10.21            |
| Fruits          | (99.4)           | 5.20 | 0.564 | 4.40             | 12.28            | (100.0)          | 3.72 | 0.424 | 2.76             | 9.57             | (99.2)           | 3.59 | 0.260 | 2.71             | 11.06            |
| Mushroom        | (45.0)           | 0.15 | 0.028 | --               | 0.67             | (25.9)           | 0.06 | 0.013 | --               | 0.28             | (30.5)           | 0.12 | 0.023 | --               | 0.57             |
| Nuts            | (48.6)           | 0.10 | 0.016 | --               | 0.52             | (76.2)           | 0.23 | 0.049 | 0.08             | 0.82             | (65.3)           | 0.28 | 0.053 | 0.02             | 1.25             |
| Herbs/Spices    | (91.3)           | 0.01 | 0.002 | 0.01             | 0.05             | (95.7)           | 0.01 | 0.002 | 0.01             | 0.06             | (94.9)           | 0.01 | 0.001 | 0.01             | 0.03             |
| Cereal Grains   | (100.0)          | 3.16 | 0.176 | 2.80             | 5.65             | (100.0)          | 3.65 | 0.173 | 3.31             | 7.48             | (100.0)          | 3.38 | 0.107 | 3.07             | 6.77             |
| Rice, white     | (90.8)           | 1.03 | 0.067 | 0.99             | 2.20             | (77.5)           | 1.09 | 0.091 | 0.96             | 2.75             | (84.9)           | 1.11 | 0.062 | 0.95             | 2.79             |
| Rice, brown     | (17.4)           | 0.09 | 0.051 | --               | 0.36             | (27.4)           | 0.16 | 0.028 | --               | 1.33             | (18.8)           | 0.15 | 0.029 | --               | 0.84             |
| Beef            | (77.7)           | 0.90 | 0.130 | 0.50             | 2.98             | (59.6)           | 0.34 | 0.058 | <0.01            | 2.08             | (82.6)           | 0.92 | 0.095 | 0.56             | 3.36             |
| Pork            | (83.1)           | 0.95 | 0.115 | 0.72             | 2.63             | (56.4)           | 0.07 | 0.010 | <0.01            | 0.35             | (73.2)           | 0.61 | 0.064 | 0.23             | 2.05             |
| Poultry         | (79.6)           | 1.18 | 0.161 | 0.97             | 3.59             | (69.7)           | 1.05 | 0.187 | 0.50             | 3.53             | (87.3)           | 1.30 | 0.064 | 1.11             | 3.96             |
| Other Meat      | (20.1)           | 0.01 | 0.012 | --               | 0.02             | (10.1)           | 0.08 | 0.033 | --               | 0.18             | (18.2)           | 0.03 | 0.008 | --               | 0.01             |
| Fish            | (59.4)           | 0.86 | 0.107 | 0.29             | 3.59             | (31.4)           | 0.51 | 0.166 | --               | 3.04             | (58.7)           | 0.95 | 0.085 | 0.27             | 3.51             |
| Fish-freshwater | (19.5)           | 0.15 | 0.036 | --               | 1.40             | (11.9)           | 0.08 | 0.040 | --               | 0.52             | (17.3)           | 0.17 | 0.040 | --               | 1.38             |
| Fish-saltwater  | (44.9)           | 0.55 | 0.067 | --               | 3.24             | (24.8)           | 0.43 | 0.170 | --               | 3.04             | (44.7)           | 0.63 | 0.071 | --               | 3.07             |
| Fish-shellfish  | (38.5)           | 0.35 | 0.105 | --               | 1.71             | (11.1)           | 0.03 | 0.014 | --               | 0.19             | (29.8)           | 0.30 | 0.047 | --               | 1.56             |
| Dairy           | (100.0)          | 4.14 | 0.452 | 2.71             | 11.61            | (98.4)           | 5.83 | 0.622 | 3.51             | 20.23            | (99.3)           | 3.07 | 0.217 | 1.73             | 11.69            |
| Egg             | (95.4)           | 0.66 | 0.061 | 0.34             | 2.07             | (81.4)           | 0.37 | 0.052 | 0.14             | 1.31             | (92.8)           | 0.45 | 0.013 | 0.25             | 1.43             |
| Oil             | (100.0)          | 0.06 | 0.008 | 0.04             | 0.18             | (100.0)          | 0.04 | 0.005 | 0.03             | 0.11             | (99.8)           | 0.05 | 0.003 | 0.03             | 0.14             |

Units are presented in g-food/kg-body weight/day. <sup>a</sup> Individuals who consumed any food commodities within food category were identified as Consumer. -- Not calculated due to high frequency of non-detected results (below limit of detection). SE - Standard Error, BW- Body Weight.

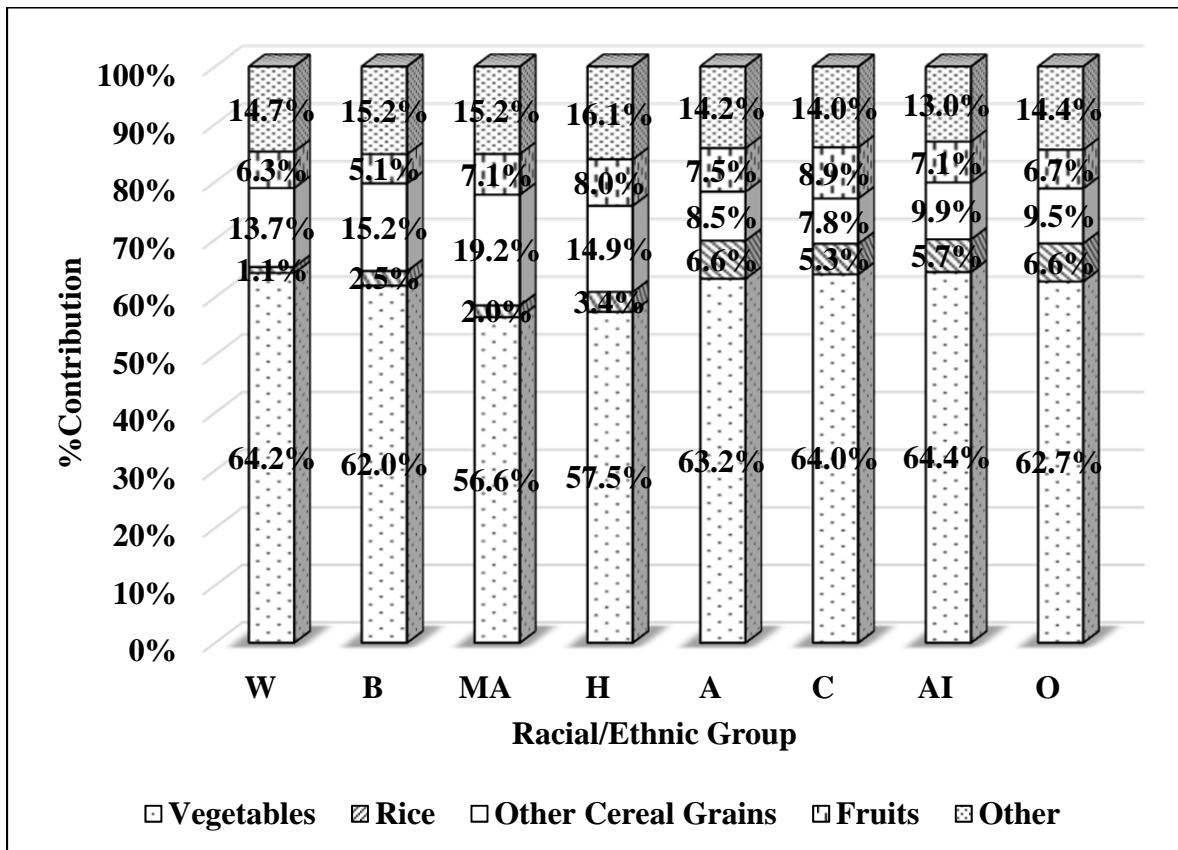

Figure S1. Food-category-specific %contribution to dietary cadmium intake by race/ethnicity

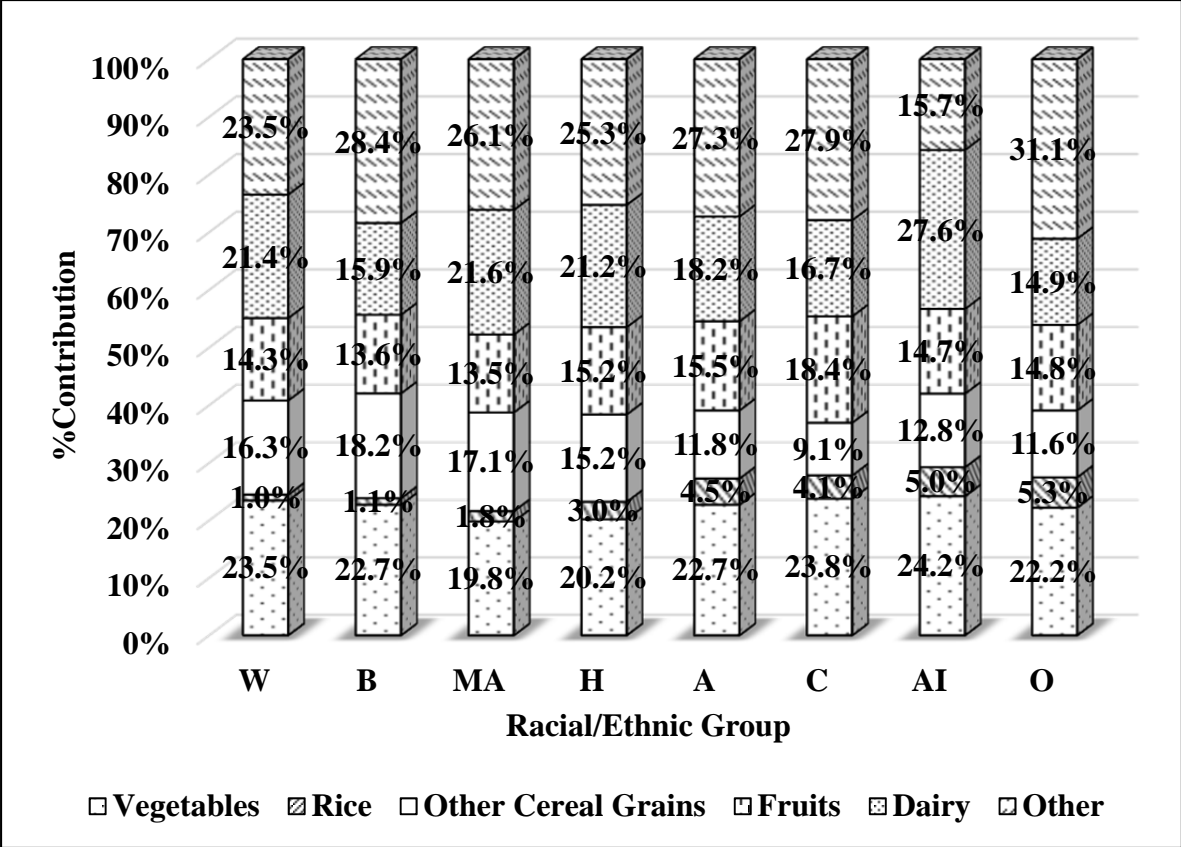

Figure S2. Food-category-specific %contribution to dietary lead intake by race/ethnicity

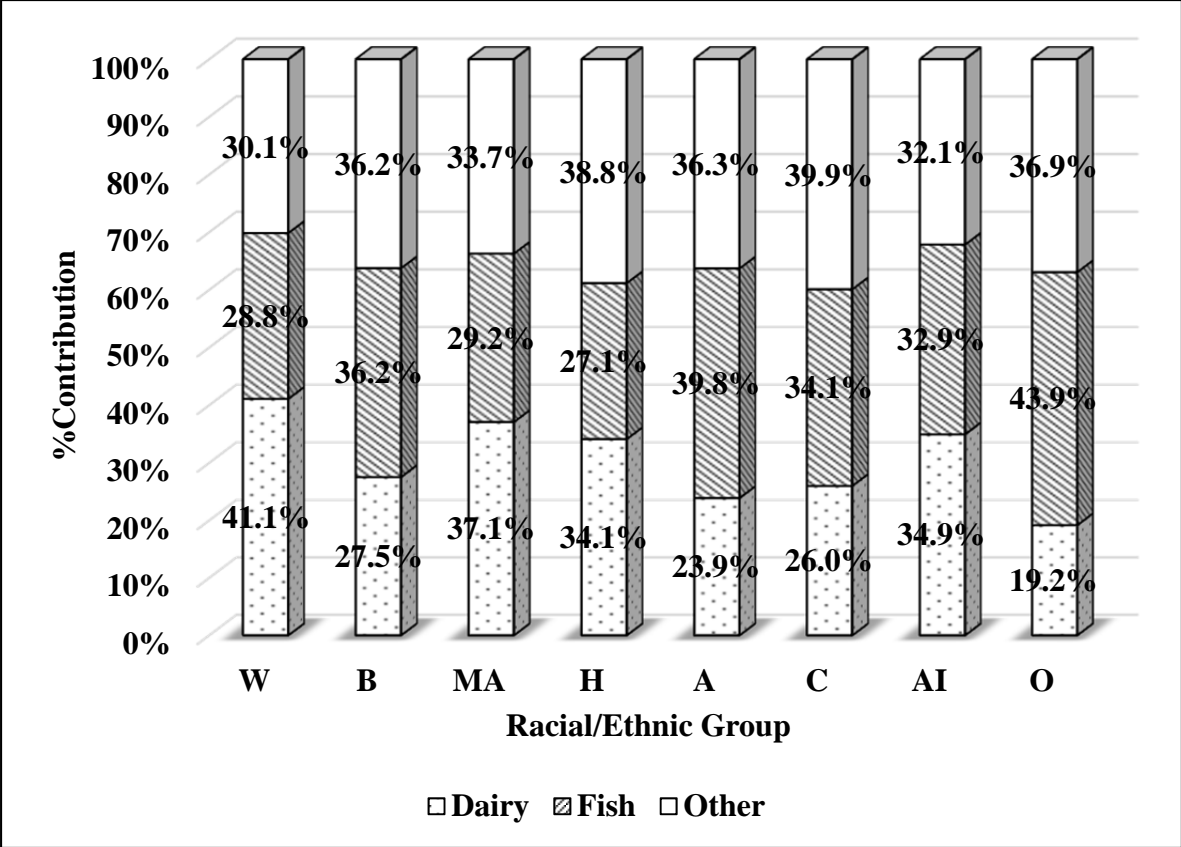

**Figure S3. Food-category-specific %contribution to dietary mercury intake by race/ethnicity**
